# Supplementary material
Source: publisher site journal article supplement (https://www.dovepress.com/article/450191)
Supplement: Supplementary file 1 [file get_supplementary_file.php]

**Supplementary Table 1. PRISMA 2020 Checklist**

| **Section and Topic** | **Item #** | **Checklist item** | **Location where item is reported** |
| --- | --- | --- | --- |
| **TITLE** | | |  |
| Title | 1 | Identify the report as a systematic review. | 1,5,6 |
| **ABSTRACT** | | |  |
| Abstract | 2 | See the PRISMA 2020 for Abstracts checklist. | 3 |
| **INTRODUCTION** | | |  |
| Rationale | 3 | Describe the rationale for the review in the context of existing knowledge. | 4-5 |
| Objectives | 4 | Provide an explicit statement of the objective(s) or question(s) the review addresses. | 3, 5 |
| **METHODS** | | |  |
| Eligibility criteria | 5 | Specify the inclusion and exclusion criteria for the review and how studies were grouped for the syntheses. | 7, Supplementary Material 3 |
| Information sources | 6 | Specify all databases, registers, websites, organisations, reference lists and other sources searched or consulted to identify studies. Specify the date when each source was last searched or consulted. | 6 |
| Search strategy | 7 | Present the full search strategies for all databases, registers and websites, including any filters and limits used. | Supplementary Material 2 |
| Selection process | 8 | Specify the methods used to decide whether a study met the inclusion criteria of the review, including how many reviewers screened each record and each report retrieved, whether they worked independently, and if applicable, details of automation tools used in the process. | 7-8,  Figure 1 |
| Data collection process | 9 | Specify the methods used to collect data from reports, including how many reviewers collected data from each report, whether they worked independently, any processes for obtaining or confirming data from study investigators, and if applicable, details of automation tools used in the process. | 8-9 |
| Data items | 10a | List and define all outcomes for which data were sought. Specify whether all results that were compatible with each outcome domain in each study were sought (e.g. for all measures, time points, analyses), and if not, the methods used to decide which results to collect. | 8 |
| 10b | List and define all other variables for which data were sought (e.g. participant and intervention characteristics, funding sources). Describe any assumptions made about any missing or unclear information. | 8-9 |
| Study risk of bias assessment | 11 | Specify the methods used to assess risk of bias in the included studies, including details of the tool(s) used, how many reviewers assessed each study and whether they worked independently, and if applicable, details of automation tools used in the process. | 8-9 |
| Effect measures | 12 | Specify for each outcome the effect measure(s) (e.g. risk ratio, mean difference) used in the synthesis or presentation of results. | NA |
| Synthesis methods | 13a | Describe the processes used to decide which studies were eligible for each synthesis (e.g. tabulating the study intervention characteristics and comparing against the planned groups for each synthesis (item #5)). | 8 |
| 13b | Describe any methods required to prepare the data for presentation or synthesis, such as handling of missing summary statistics, or data conversions. | 8-9 |
| 13c | Describe any methods used to tabulate or visually display results of individual studies and syntheses. | NA |
| 13d | Describe any methods used to synthesize results and provide a rationale for the choice(s). If meta-analysis was performed, describe the model(s), method(s) to identify the presence and extent of statistical heterogeneity, and software package(s) used. | NA |
| 13e | Describe any methods used to explore possible causes of heterogeneity among study results (e.g. subgroup analysis, meta-regression). | NA |
| 13f | Describe any sensitivity analyses conducted to assess robustness of the synthesized results. | NA |
| Reporting bias assessment | 14 | Describe any methods used to assess risk of bias due to missing results in a synthesis (arising from reporting biases). | NA |
| Certainty assessment | 15 | Describe any methods used to assess certainty (or confidence) in the body of evidence for an outcome. | NA |
| **RESULTS** | | |  |
| Study selection | 16a | Describe the results of the search and selection process, from the number of records identified in the search to the number of studies included in the review, ideally using a flow diagram. | 10, Figure 1 |
| 16b | Cite studies that might appear to meet the inclusion criteria, but which were excluded, and explain why they were excluded. | 8-9, 25, Supplementary Material 3, Figure 1 |
| Study characteristics | 17 | Cite each included study and present its characteristics. | Table 1,  Supplementary Material 4 |
| Risk of bias in studies | 18 | Present assessments of risk of bias for each included study. | 11 |
| Results of individual studies | 19 | For all outcomes, present, for each study: (a) summary statistics for each group (where appropriate) and (b) an effect estimate and its precision (e.g. confidence/credible interval), ideally using structured tables or plots. | NA |
| Results of syntheses | 20a | For each synthesis, briefly summarise the characteristics and risk of bias among contributing studies. | 11 |
| 20b | Present results of all statistical syntheses conducted. If meta-analysis was done, present for each the summary estimate and its precision (e.g. confidence/credible interval) and measures of statistical heterogeneity. If comparing groups, describe the direction of the effect. | NA |
| 20c | Present results of all investigations of possible causes of heterogeneity among study results. | NA |
| 20d | Present results of all sensitivity analyses conducted to assess the robustness of the synthesized results. | NA |
| Reporting biases | 21 | Present assessments of risk of bias due to missing results (arising from reporting biases) for each synthesis assessed. | NA |
| Certainty of evidence | 22 | Present assessments of certainty (or confidence) in the body of evidence for each outcome assessed. | NA |
| **DISCUSSION** | | |  |
| Discussion | 23a | Provide a general interpretation of the results in the context of other evidence. | 21-24 |
| 23b | Discuss any limitations of the evidence included in the review. | 21-24 |
| 23c | Discuss any limitations of the review processes used. | 25 |
| 23d | Discuss implications of the results for practice, policy, and future research. | 24 |
| **OTHER INFORMATION** | | |  |
| Registration and protocol | 24a | Provide registration information for the review, including register name and registration number, or state that the review was not registered. | 6 |
| 24b | Indicate where the review protocol can be accessed, or state that a protocol was not prepared. | 6 |
| 24c | Describe and explain any amendments to information provided at registration or in the protocol. | NA |
| Support | 25 | Describe sources of financial or non-financial support for the review, and the role of the funders or sponsors in the review. | 27 |
| Competing interests | 26 | Declare any competing interests of review authors. | 27 |
| Availability of data, code and other materials | 27 | Report which of the following are publicly available and where they can be found: template data collection forms; data extracted from included studies; data used for all analyses; analytic code; any other materials used in the review. | 26 |

**Note:** Adapted fromPage MJ, Moher D, Bossuyt PM, et al. PRISMA 2020 explanation and elaboration: updated guidance and exemplars for reporting systematic reviews. *Bmj.* 2021;372:n160.

**Supplementary Material 1. Complete Search Strategy**

**Ovid MEDLINE(R) ALL <1946 to January 23, 2023>**

<https://login.ezproxy.library.ualberta.ca/login?url=http://ovidsp.ovid.com/ovidweb.cgi?T=JS&NEWS=N&PAGE=main&SHAREDSEARCHID=5QnpLcCRwHsbvhYGiQVqgT9m5b3CYaxwb6IMCn6sAiHsjtOqXRAbq90rHOztAoJtb>

1 exp Intellectual Disability/ or Persons with mental disabilities/ 106652

2 neurodevelopmental disorders/ or exp "attention deficit and disruptive behavior disorders"/ or exp child development disorders, pervasive/ or developmental disabilities/ or exp tic disorders/ 110158

3 Cerebral Palsy/ 23250

4 Fetal Alcohol Spectrum Disorders/ 4605

5 Acrocephalosyndactylia/ 1699

6 Phenylketonurias/ or Kernicterus/ 8468

7 exp Muscular Dystrophies/ 29502

8 Spasms, Infantile/ 4161

9 (((developmental* or intellectual*) adj3 (disab* or impair* or delay* or disorder*)) or (mental* adj3 (delay* or impair* or challenged or retard*)) or special needs or autis* or asperger* or pervasive developmental disorder* or ADHD or attention-deficit or Apert Syndrome or apert-crouzon or Noack syndrome or acrocephalosyndactyl* or Pfeiffer syndrome or chotzen syndrome or casperson syndrome or Cerebral Palsy or ((CDKL5 or cyclin-dependent kinase-like 5 or retts or rett or "rett's") adj3 (disorder* or Syndrome)) or West syndrome or Down* Syndrome or Fetal Alcohol or Fragile X or Kernicterus or bilirubin encephalopath* or Prader-Willi or Phenylketonuria* or PKU or pah deficien* or phenylalanine hydroxylase or Muscular Dystroph* or myodystroph* or Tourette* or tic disorder* or Williams Syndrome or "Infantile Spasm*" or (Developmental adj2 (Hearing Loss or hearing impair*))).mp. 364005

10 or/1-9 383537

11 adolescent/ or exp child/ or exp infant/ 3918143

12 ((child* or teen* or adolesc* or preteen* or youth* or toddler* or infant* or baby or babies or newborn* or neonate* or preschool* or pre-school*) not adult-children).mp. 4636213

13 11 or 12 4637046

14 exp Parents/ or Family/ or Caregivers/ 254394

15 (caregiver* or guardian* or parent* or mother* or father* or moms or dads or family or families or grandparent*).mp. 1994306

16 14 or 15 1994306

17 (experience* or perception* or perceive* or perspective* or opinion* or attitude* or belief* or voice or self-report* or narrati* or expectation* or impression* or views or stories or reflections or preferences or concerns or complian* or comply* or noncomplian* or adhere* or nonadhere* or awareness or satisfied or satisfaction or faciltitat* or challenges or barrier* or difficulties or difficulty or obstacle* or hurdle* or barricade* or hindrance* or obstruct* or disparit* or inequi* or inequal* or impede* or impediment* or interview* or focus-group* or questionnaire* or survey* or anxiety or stress* or fear* or distress* or thoughts or feelings or emotions or misconception* or misunderstand* or myth*).mp. 7118170

18 ((need or needs or seek* or preference* or request* or support or supports) adj10 (information or knowledge or learn* or comprehension or comprehend*)).mp. 162333

19 ((know* or learn* or comprehen* or information) adj4 (more or lack or better or deficit* or deficient* or sufficient or insufficient or interested or interest or interesting)).mp. 222382

20 consumer health information/ or patient education as topic/ or needs assessment/ 122262

21 Caregivers/ed, px or Family/ed, px or Parents/ed, px 83356

22 Attitude to health/ or Health Knowledge, Attitudes, Practice/ or health literacy/ or exp "treatment adherence and compliance"/ 455195

23 Information Seeking Behavior/ 3123

24 (literacy or literate).mp. 34099

25 ((caregiver* or guardian* or parent* or mother* or father* or moms or dads or family or families or grandparent*) adj8 (inform* or know* or learn* or comprehension or comprehend* or question*)).mp. 152172

26 ((information or know*) and (mak* decision* or decision making)).mp. 86706

27 (inform* or know*).ti,kf. or (inform* or know*).ab. /freq=3 522187

28 or/17-27 7638226

29 Emergency Treatment/ or Emergency Medicine/ or emergency medical services/ or emergency service, hospital/ or trauma centers/ or triage/ or exp Evidence-Based Emergency Medicine/ or exp Emergency Nursing/ or Emergencies/ or emergicent*.mp. or ((emergenc* or casualty or ER or ED) adj1 (room* or accident or ward or wards or unit or units or department* or physician* or doctor* or nurs* or visit* or care or setting or patient*)).mp. or (triage or (trauma adj1 (cent* or care))).mp. 322423

30 10 and 13 and 16 and 28 and 29 226

31 limit 30 to english language 221

**Embase <1974 to 2023 January 23>(OVID interface)**

<https://login.ezproxy.library.ualberta.ca/login?url=http://ovidsp.ovid.com/ovidweb.cgi?T=JS&NEWS=N&PAGE=main&SHAREDSEARCHID=2xaS9XYw7ONVuaqay1FbmA2MU7cHvCNPv65Wb5y0B8t4tmgcxaGqf8mJInB5nZlkx>

1 intellectual impairment/ 36139

2 mental deficiency/ or down syndrome/ 89193

3 fragile X syndrome/ 9700

4 developmental disorder/ or developmental delay/ 52169

5 attention deficit hyperactivity disorder/ 5771

6 exp autism/ 89119

7 cerebral palsy/ 42953

8 tic/ or gilles de la tourette syndrome/ 15264

9 exp muscular dystrophy/ 49665

10 infantile spasm/ 8140

11 kernicterus/ 2036

12 phenylketonuria/ 9070

13 acrocephalosyndactyly/ 2494

14 fetal alcohol syndrome/ 7542

15 exp mental retardation malformation syndrome/ 44819

16 (((developmental* or intellectual*) adj3 (disab* or impair* or delay* or disorder*)) or (mental* adj3 (delay* or impair* or challenged or retard*)) or special needs or autis* or asperger* or pervasive developmental disorder* or ADHD or attention-deficit or Apert Syndrome or apert-crouzon or Noack syndrome or acrocephalosyndactyl* or Pfeiffer syndrome or chotzen syndrome or casperson syndrome or Cerebral Palsy or ((CDKL5 or cyclin-dependent kinase-like 5 or retts or rett or "rett's") adj3 (disorder* or Syndrome)) or West syndrome or Down* Syndrome or Fetal Alcohol or Fragile X or Kernicterus or bilirubin encephalopath* or Prader-Willi or Phenylketonuria* or PKU or pah deficien* or phenylalanine hydroxylase or Muscular Dystroph* or myodystroph* or Tourette* or tic disorder* or Williams Syndrome or "Infantile Spasm*" or (Developmental adj2 (Hearing Loss or hearing impair*))).mp. 481461

17 or/1-16 522554

18 child/ or boy/ or girl/ or exp infant/ or preschool child/ or toddler/ 2896633

19 adolescent/ 1716597

20 ((child* or teen* or adolesc* or preteen* or youth* or toddler* or infant* or baby or babies or newborn* or neonate* or preschool* or pre-school*) not adult-children).mp. 4671892

21 18 or 19 or 20 4682366

22 parent/ or father/ or mother/ 205551

23 caregiver/ 107041

24 family/ or family relation/ 111463

25 (caregiver* or guardian* or parent* or mother* or father* or mom or moms or dad or dads or family or families or grandparent*).mp. 2449633

26 22 or 23 or 24 or 25 2449633

27 (experience* or perception* or perceive* or perspective* or opinion* or attitude* or belief* or voice or self-report* or narrati* or expectation* or impression* or views or stories or reflections or preferences or concerns or complian* or comply* or noncomplian* or adhere* or nonadhere* or awareness or satisfied or satisfaction or faciltitat* or challenges or barrier* or difficulties or difficulty or obstacle* or hurdle* or barricade* or hindrance* or obstruct* or disparit* or inequi* or inequal* or impede* or impediment* or interview* or focus-group* or questionnaire* or survey* or anxiety or stress* or fear* or distress* or thoughts or feelings or emotions or misconception* or misunderstand* or myth*).mp. 9965304

28 ((need or needs or seek* or preference* or request* or support or supports) adj10 (information or knowledge or learn* or comprehension or comprehend*)).mp. 202806

29 ((know* or learn* or comprehen* or information) adj4 (more or lack or better or deficit* or deficient* or sufficient or insufficient or interested or interest or interesting)).mp. 292976

30 (literacy or literate).mp. 42468

31 ((caregiver* or guardian* or parent* or mother* or father* or moms or dads or family or families or grandparent*) adj8 (inform* or know* or learn* or comprehension or comprehend* or question*)).mp. 206233

32 ((information or know*) and (mak* decision* or decision making)).mp. 158714

33 (inform* or know*).ti,kf. or (inform* or know*).ab. /freq=3 666767

34 patient education/ 122762

35 attitude to health/ 126080

36 health literacy/ 17357

37 patient compliance/ or patient attitude/ 214587

38 information seeking/ 4566

39 medical information/ 84423

40 consumer health information/ 4213

41 needs assessment/ 26902

42 or/27-41 10579969

43 emergency treatment/ or emergency medicine/ or exp emergency health service/ or evidence based emergency medicine/ or emergency nursing/ or exp emergency care/ or emergency ward/ or emergency/ or emergicent*.mp. or ((emergenc* or casualty or ER or ED) adj1 (room* or accident or ward or wards or unit or units or department* or physician* or doctor* or nurs* or visit* or care or setting or patient*)).mp. or (triage or (trauma adj1 (cent* or care))).mp. 537559

44 17 and 21 and 26 and 42 and 43 657

45 limit 44 to english language 646

**APA PsycInfo <1806 to January Week 3 2023>**

<https://login.ezproxy.library.ualberta.ca/login?url=http://ovidsp.ovid.com/ovidweb.cgi?T=JS&NEWS=N&PAGE=main&SHAREDSEARCHID=1BaCdn6XP1spz2QH6rOopgNMINqOX6YLIzzmQh1ALaZKyxZZjlrCqRDaSOHXTUdOs>

1 intellectual development disorder/ or down's syndrome/ or exp developmental disabilities/ or fetal alcohol syndrome/ or fragile x syndrome/ or phenylketonuria/ or rett syndrome/ or williams syndrome/ 66209

2 neurodevelopmental disorders/ or exp attention deficit disorder/ or exp autism spectrum disorders/ 83857

3 prader willi syndrome/ or cystic fibrosis/ or developmental disabilities/ 15015

4 muscular dystrophy/ 1484

5 (((developmental* or intellectual*) adj3 (disab* or impair* or delay* or disorder*)) or (mental* adj3 (delay* or impair* or challenged or retard*)) or special needs or autis* or asperger* or pervasive developmental disorder* or ADHD or attention-deficit or Apert Syndrome or apert-crouzon or Noack syndrome or acrocephalosyndactyl* or Pfeiffer syndrome or chotzen syndrome or casperson syndrome or Cerebral Palsy or ((CDKL5 or cyclin-dependent kinase-like 5 or retts or rett or "rett's") adj3 (disorder* or Syndrome)) or West syndrome or Down* Syndrome or Fetal Alcohol or Fragile X or Kernicterus or bilirubin encephalopath* or Prader-Willi or Phenylketonuria* or PKU or pah deficien* or phenylalanine hydroxylase or Muscular Dystroph* or myodystroph* or Tourette* or tic disorder* or Williams Syndrome or "Infantile Spasm*" or (Developmental adj2 (Hearing Loss or hearing impair*))).mp. 217624

6 1 or 2 or 3 or 4 or 5 221257

7 ((child* or teen* or adolesc* or preteen* or youth* or toddler* or infant* or baby or babies or newborn* or neonate* or preschool* or pre-school*) not adult-children).mp. 1264704

8 parents/ or fathers/ or mothers/ 95842

9 family/ 58613

10 caregivers/ 34800

11 (caregiver* or guardian* or parent* or mother* or father* or mom or moms or dad or dads or family or families or grandparent*).mp. 762260

12 8 or 9 or 10 or 11 762260

13 (experience* or perception* or perceive* or perspective* or opinion* or attitude* or belief* or voice or self-report* or narrati* or expectation* or impression* or views or stories or reflections or preferences or concerns or complian* or comply* or noncomplian* or adhere* or nonadhere* or awareness or satisfied or satisfaction or faciltitat* or challenges or barrier* or difficulties or difficulty or obstacle* or hurdle* or barricade* or hindrance* or obstruct* or disparit* or inequi* or inequal* or impede* or impediment* or interview* or focus-group* or questionnaire* or survey* or anxiety or stress* or fear* or distress* or thoughts or feelings or emotions or misconception* or misunderstand* or myth*).mp. 3259749

14 ((need or needs or seek* or preference* or request* or support or supports) adj10 (information or knowledge or learn* or comprehension or comprehend*)).mp. 122098

15 ((know* or learn* or comprehen* or information) adj4 (more or lack or better or deficit* or deficient* or sufficient or insufficient or interested or interest or interesting)).mp. 113841

16 (literacy or literate).mp. 43619

17 ((caregiver* or guardian* or parent* or mother* or father* or moms or dads or family or families or grandparent*) adj8 (inform* or know* or learn* or comprehension or comprehend* or question*)).mp. 112538

18 ((information or know*) and (mak* decision* or decision making)).mp. 53721

19 (inform* or know*).ti. or (inform* or know*).ab. /freq=3 236013

20 exp Health Information/ or Information Seeking/ or Consumer Attitudes/ or Health Literacy/ 27076

21 health attitudes/ or treatment barriers/ 17753

22 treatment compliance/ or client attitudes/ 35301

23 client education/ 4507

24 needs assessment/ 4578

25 or/13-24 3400227

26 ("emergency department" or "emergencies program").id. or emergicent*.mp. or ((emergenc* or casualty or ER or ED) adj1 (room* or accident or ward or wards or unit or units or department* or physician* or doctor* or nurs* or visit* or care or setting or patient*)).mp. or (triage or (trauma adj1 (cent* or care))).mp. 20401

27 6 and 7 and 12 and 25 and 26 141

28 limit 27 to english language 136

**Cochrane Library - Advanced Search (Wiley interface)**

Date searched: Jan 24, 2023

Results: 40

#1 [mh "Intellectual Disability"] or [mh ^"Persons with mental disabilities"] or [mh ^"neurodevelopmental disorders"] or [mh "attention deficit and disruptive behavior disorders"] or [mh "child development disorders, pervasive"] or [mh ^"developmental disabilities"] or [mh "tic disorders"] or [mh ^"Cerebral Palsy"] or [mh ^"Fetal Alcohol Spectrum Disorders"] or [mh ^"Acrocephalosyndactylia"] or [mh ^"Phenylketonurias"] or [mh ^"Kernicterus"] or [mh "Muscular Dystrophies"] or [mh ^"Spasms, Infantile"]

#2 (((developmental* or intellectual*) NEAR/3 (disab* or impair* or delay* or disorder*)) or (mental* NEAR/3 (delay* or impair* or challenged or retard*)) or special-needs or autis* or asperger* or pervasive-developmental-disorder* or ADHD or attention-deficit or Apert-Syndrome or apert-crouzon or Noack syndrome or acrocephalosyndactyl* or Pfeiffer-syndrome or chotzen-syndrome or casperson-syndrome or Cerebral-Palsy or ((CDKL5 or cyclin-dependent-kinase-like-5 or retts or rett or "rett's") NEAR/3 (disorder* or Syndrome)) or West-syndrome or Down-Syndrome or Fetal-Alcohol or Fragile-X or Kernicterus or bilirubin-encephalopathy or Prader-Willi or Phenylketonuria* or PKU or pah-deficiency or phenylalanine-hydroxylase or Muscular-Dystrophy or myodystroph* or Tourette* or tic-disorders or Williams Syndrome or "Infantile-Spasm" or (Developmental NEAR/2 (Hearing-Loss or hearing impaired or hearing-impairment))):ti,ab,kw

#3 #1 OR #2

#4 ((child or children or teen* or adolesc* or preteen* or youth* or toddler* or infant* or baby or babies or newborn* or neonate* or preschool* or pre-school*) not adult-children):ti,ab,kw

#5 (caregiver* or guardian* or parent* or mother* or father* or moms or dads or family or families or grandparent*):ti,ab,kw

#6 [mh ^"consumer health information"] or [mh ^"patient education as topic"] or [mh ^"needs assessment"] or [mh ^"Attitude to health"] or [mh ^"Health Knowledge, Attitudes, Practice"] or [mh ^"health literacy"] or [mh "treatment adherence and compliance"] or [mh ^"Information Seeking Behavior"]

#7 (experience* or perception* or perceive* or perspective* or opinion* or attitude* or belief* or voice or self-report* or narrati* or expectation* or impression* or views or stories or reflections or preferences or concerns or complian* or comply* or noncomplian* or adhere* or nonadhere* or awareness or satisfied or satisfaction or faciltitat* or challenges or barrier* or difficulties or difficulty or obstacle* or hurdle* or barricade* or hindrance* or obstruct* or disparit* or inequi* or inequal* or impede* or impediment* or interview* or focus-group* or questionnaire* or survey* or anxiety or stress* or fear* or distress* or thoughts or feelings or emotions or misconception* or misunderstand* or myth*):ti,ab,kw

#8 ((need or needs or seek* or preference* or request* or support or supports) NEAR/10 (information or knowledge or learn* or comprehension or comprehend*)):ti,ab,kw

#9 ((know* or learn* or comprehen* or information) NEAR/4 (more or lack or better or deficit* or deficient* or sufficient or insufficient or interested or interest or interesting)):ti,ab,kw

#10 (literacy or literate):ti,ab,kw

#11 ((caregiver* or guardian* or parent* or mother* or father* or moms or dads or family or families or grandparent*) NEAR/8 (inform* or know* or learn* or comprehension or comprehend* or question*)):ti,ab,kw

#12 (inform* or know*):ti

#13 #6 OR #7 OR #8 OR #9 OR #10 OR #11 OR #12

#14 [mh ^"Emergency Treatment"] or [mh ^" Emergency Medicine"] or [mh ^"emergency medical services"] or [mh ^"emergency service, hospital"] or [mh ^" trauma centers"] or [mh ^"triage"] or [mh "Evidence-Based Emergency Medicine"] or [mh "Emergency Nursing"] or [mh ^"Emergencies"] or emergicent*:ti,ab,kw or ((emergenc* or casualty or ER or ED) NEAR/1 (room* or accident or ward or wards or unit or units or department* or physician* or doctor* or nurs* or visit* or care or setting or patient*)):ti,ab,kw or (triage or (trauma NEAR/1 (cent* or care))):ti,ab,kw

#15 #3 AND #4 AND #5 AND #13 AND #14

**CINAHL PLUS with Full Text (EBSCOhost database)**

Date searched: Jan 24, 2023

Results: 189

(MH "Mental Disorders Diagnosed in Childhood") OR (MH "Attention Deficit Hyperactivity Disorder") OR (MH "Child Development Disorders+") OR (MH "Child Development Disorders, Pervasive+") OR (MH "Developmental Disabilities") OR (MH "Intellectual Disability+") or (MH "Persons with Mental Disabilities") OR (MH "Children with Disabilities") OR (MH "Spasms, Infantile") OR (MH "Muscular Dystrophy+") OR (MH "Kernicterus") OR (MH "Phenylketonuria+") OR (MH "Acrocephalosyndactylia+") OR (MH "Cerebral Palsy") OR (MH "Fetal Alcohol Syndrome") OR ((developmental* or intellectual*) N3 (disab* or impair* or delay* or disorder*)) or (mental* N3 (delay* or impair* or challenged or retard*)) or special-needs or autis* or asperger* or pervasive-developmental-disorder* or ADHD or attention-deficit or Apert-Syndrome or apert-crouzon or Noack-syndrome or acrocephalosyndactyl* or Pfeiffer-syndrome or chotzen-syndrome or casperson-syndrome or Cerebral-Palsy or ((CDKL5 or cyclin-dependent-kinase-like-5 or retts or rett or "rett's") N3 (disorder* or Syndrome)) or West-syndrome or Down*-Syndrome or Fetal-Alcohol or Fragile-X or Kernicterus or bilirubin-encephalopath* or Prader-Willi or Phenylketonuria* or PKU or pah-deficien* or phenylalanine-hydroxylase or Muscular-Dystroph* or myodystroph* or Tourette* or tic-disorder* or Williams-Syndrome or "Infantile Spasm*" or (Developmental N2 (Hearing-Loss or hearing-impair*))

S2 (child* or teen* or adolesc* or preteen* or youth* or toddler* or infant* or baby or babies or newborn* or neonate* or preschool* or pre-school*) not adult-children

S3 caregiver* or guardian* or parent* or mother* or father* or moms or dads or family or families or grandparent*

S4 (MH "Consumer Health Information") OR (MH "Health Literacy") OR (MH "Health Information") OR (MH "Information Resources") OR (MH "Health Education") OR (MH "Patient Education") OR (MH "Attitude to Health") OR (MH "Patient Compliance+") OR (MH "Patient Satisfaction+") OR (MH "Patient Preference") OR (MH "Health Beliefs") OR (MH "Family Attitudes+") OR (MH "Parental Attitudes+") OR (MH "Patient Attitudes") OR (MH "Caregiver Attitudes") OR (MH "Information Literacy") OR (MH "Information Seeking Behavior") OR (MH "Information Needs") or experience* or perception* or perceive* or perspective* or opinion* or attitude* or belief* or voice or self-report* or narrati* or expectation* or impression* or views or stories or reflections or preferences or concerns or complian* or comply* or noncomplian* or adhere* or nonadhere* or awareness or satisfied or satisfaction or faciltitat* or challenges or barrier* or difficulties or difficulty or obstacle* or hurdle* or barricade* or hindrance* or obstruct* or disparit* or inequi* or inequal* or impede* or impediment* or interview* or focus-group* or questionnaire* or survey* or anxiety or stress* or fear* or distress* or thoughts or feelings or emotions or misconception* or misunderstand* or myth or ((need or needs or seek* or preference* or request* or support or supports) N10 (information or knowledge or learn* or comprehension or comprehend*)) or ((know* or learn* or comprehen* or information) N4 (more or lack or better or deficit* or deficient* or sufficient or insufficient or interested or interest or interesting)) OR literacy or literate or ((caregiver* or guardian* or parent* or mother* or father* or moms or dads or family or families or grandparent*) N8 (inform* or know* or learn* or comprehension or comprehend* or question*)) or ((information or know*) and (mak*-decision* or decision-making)) or TI(inform* or know*)

S5 (MH "Emergency Service+") or (MH "Emergency Medicine") or (MH "Physicians, Emergency") OR (MH "Emergency Nurse Practitioners") or (MH "Emergency Nursing+") or (MH "Emergency Patients") or emergicent* or ((emergenc* or casualty or ER or ED) N1 (room* or accident or ward or wards or unit or units or department* or physician* or doctor* or nurs* or visit* or care or setting or patient*)) or triage or (trauma N1 (cent* or care))

S6 S1 AND S2 AND S3 AND S4 AND S5 limiter english language 189

**Scopus (Advanced Search)**

Date searched: Jan 24, 2023

Results: 460

TITLE-ABS-KEY ( ( ( developmental* OR intellectual* ) W/3 ( disab* OR impair* OR delay* OR disorder* ) ) OR ( mental* W/3 ( delay* OR impair* OR challenged OR retard* ) ) OR special-needs OR autis* OR asperger* OR pervasive-developmental-disorder* OR adhd OR attention-deficit OR apert-syndrome OR apert-crouzon OR noack-syndrome OR acrocephalosyndactyl* OR pfeiffer-syndrome OR chotzen-syndrome OR casperson-syndrome OR cerebral-palsy OR ( ( cdkl5 OR cyclin-dependent-kinase-like-5 OR retts OR rett OR "rett's" ) W/3 ( disorder* OR syndrome ) ) OR west-syndrome OR down*-syndrome OR fetal-alcohol OR fragile-x OR kernicterus OR bilirubin-encephalopath* OR prader-willi OR phenylketonuria* OR pku OR pah-deficien* OR phenylalanine-hydroxylase OR muscular-dystroph* OR myodystroph* OR tourette* OR tic-disorder* OR williams-syndrome OR "Infantile Spasm*" OR ( developmental W/2 ( hearing-loss OR hearing-impair* ) ) ) AND TITLE-ABS-KEY ( ( child* OR teen* OR adolesc* OR preteen* OR youth* OR toddler* OR infant* OR baby OR babies OR newborn* OR neonate* OR preschool* OR pre-school* ) AND NOT adult-children ) AND TITLE-ABS-KEY ( caregiver* OR guardian* OR parent* OR mother* OR father* OR moms OR dads OR family OR families OR grandparent* ) AND ( KEY ( "Health Information" OR "Information Resources" OR "Health Education" OR "Patient Education" OR "Attitude to Health" OR "Patient Compliance" OR "Patient Satisfaction" OR "Patient Preference" OR "Health Beliefs" OR "Patient Attitudes" OR "Caregiver Attitudes" OR "Information Literacy" OR "Information Seeking" OR "Information Needs" OR "needs assessment" ) OR TITLE-ABS-KEY ( experience* OR perception* OR perceive* OR perspective* OR opinion* OR attitude* OR belief* OR voice OR self-report* OR narrati* OR expectation* OR impression* OR views OR stories OR reflections OR preferences OR concerns OR complian* OR comply* OR noncomplian* OR adhere* OR nonadhere* OR awareness OR satisfied OR satisfaction OR faciltitat* OR challenges OR barrier* OR difficulties OR difficulty OR obstacle* OR hurdle* OR barricade* OR hindrance* OR obstruct* OR disparit* OR inequi* OR inequal* OR impede* OR impediment* OR interview* OR focus-group* OR questionnaire* OR survey* OR anxiety OR stress* OR fear* OR distress* OR thoughts OR feelings OR emotions OR misconception* OR misunderstand* OR myth OR ( ( need OR needs OR seek* OR preference* OR request* OR support OR supports ) W/10 ( information OR knowledge OR learn* OR comprehension OR comprehend* ) ) OR ( ( know* OR learn* OR comprehen* OR information ) W/4 ( more OR lack OR better OR deficit* OR deficient* OR sufficient OR insufficient OR interested OR interest OR interesting ) ) OR literacy OR literate OR ( ( caregiver* OR guardian* OR parent* OR mother* OR father* OR moms OR dads OR family OR families OR grandparent* ) W/8 ( inform* OR know* OR learn* OR comprehension OR comprehend* OR question* ) ) OR ( ( information OR know* ) AND ( mak*-decision* OR decision-making ) ) ) OR TITLE ( inform* OR know* ) ) AND TITLE-ABS-KEY ( emergicent* OR ( ( emergenc* OR casualty OR er OR ed ) W/1 ( room* OR accident OR ward OR wards OR unit OR units OR department* OR physician* OR doctor* OR nurs* OR visit* OR care OR setting OR patient* OR services OR health-services ) ) OR triage OR ( trauma W/1 ( cent* OR care ) ) ) AND ( LIMIT-TO ( LANGUAGE , "English" ) )

**Conference Proceedings Citation Index – Science (CPCI-S), Conference Proceedings Citation Index – Social Science & Humanities (CPCI-SSH) (Clarivate/Web of Science Platform)**

***Timespan: 2021-01-01 to 2023-01-25 (Publication Date)***

Date searched: Jan 24, 2023

Results: 0

TS= ( ( ( developmental* OR intellectual* ) NEAR/3 ( disab* OR impair* OR delay* OR disorder* ) ) OR ( mental* NEAR/3 ( delay* OR impair* OR challenged OR retard* ) ) OR special-needs OR autis* OR asperger* OR pervasive-developmental-disorder* OR adhd OR attention-deficit OR apert-syndrome OR apert-crouzon OR noack-syndrome OR acrocephalosyndactyl* OR pfeiffer-syndrome OR chotzen-syndrome OR casperson-syndrome OR cerebral-palsy OR ( ( cdkl5 OR cyclin-dependent-kinase-like-5 OR retts OR rett OR "rett's" ) NEAR/3 ( disorder* OR syndrome ) ) OR west-syndrome OR down*-syndrome OR fetal-alcohol OR fragile-x OR kernicterus OR bilirubin-encephalopath* OR prader-willi OR phenylketonuria* OR pku OR pah-deficien* OR phenylalanine-hydroxylase OR muscular-dystroph* OR myodystroph* OR tourette* OR tic-disorder* OR williams-syndrome OR "Infantile Spasm*" OR ( developmental NEAR/2 ( hearing-loss OR hearing-impair* ) ) ) AND TS=( ( child* OR teen* OR adolesc* OR preteen* OR youth* OR toddler* OR infant* OR baby OR babies OR newborn* OR neonate* OR preschool* OR pre-school* ) NOT adult-children ) AND TS=( caregiver* OR guardian* OR parent* OR mother* OR father* OR moms OR dads OR family OR families OR grandparent* ) AND ( TS=( "Health Information" OR "Information Resources" OR "Health Education" OR "Patient Education" OR "Attitude to Health" OR "Patient Compliance" OR "Patient Satisfaction" OR "Patient Preference" OR "Health Beliefs" OR "Patient Attitudes" OR "Caregiver Attitudes" OR "Information Literacy" OR "Information Seeking" OR "Information Needs" OR "needs assessment" OR experience* OR perception* OR perceive* OR perspective* OR opinion* OR attitude* OR belief* OR voice OR self-report* OR narrati* OR expectation* OR impression* OR views OR stories OR reflections OR preferences OR concerns OR complian* OR comply* OR noncomplian* OR adhere* OR nonadhere* OR awareness OR satisfied OR satisfaction OR faciltitat* OR challenges OR barrier* OR difficulties OR difficulty OR obstacle* OR hurdle* OR barricade* OR hindrance* OR obstruct* OR disparit* OR inequi* OR inequal* OR impede* OR impediment* OR interview* OR focus-group* OR questionnaire* OR survey* OR anxiety OR stress* OR fear* OR distress* OR thoughts OR feelings OR emotions OR misconception* OR misunderstand* OR myth OR ( ( need OR needs OR seek* OR preference* OR request* OR support OR supports ) NEAR/10 ( information OR knowledge OR learn* OR comprehension OR comprehend* ) ) OR ( ( know* OR learn* OR comprehen* OR information ) NEAR/4 ( more OR lack OR better OR deficit* OR deficient* OR sufficient OR insufficient OR interested OR interest OR interesting ) ) OR literacy OR literate OR ( ( caregiver* OR guardian* OR parent* OR mother* OR father* OR moms OR dads OR family OR families OR grandparent* ) NEAR/8 ( inform* OR know* OR learn* OR comprehension OR comprehend* OR question* ) ) OR ( ( information OR know* ) AND ( mak*-decision* OR decision-making ) ) ) OR TI=( inform* OR know* ) ) AND TS= ( emergicent* OR ( ( emergenc* OR casualty OR er OR ed ) NEAR/1 ( room* OR accident OR ward OR wards OR unit OR units OR department* OR physician* OR doctor* OR nurs* OR visit* OR care OR setting OR patient* OR services OR health-services ) ) OR triage OR ( trauma NEAR/1 ( cent* OR care ) ) )

**Proquest Dissertations and Theses Global (Command Language search)**

Date searched: Jan 24, 2023

Results: 30 results

noft(( ( developmental* OR intellectual* ) NEAR/3 ( disabled OR disability OR impaired OR impairment OR delay OR disorder ) ) OR (( mental OR mentally) NEAR/3 ( delay* OR impaired or impairment OR challenged OR retardation ) ) OR special-needs OR autism OR autistic OR asperger OR pervasive-developmental-disorder OR adhd OR attention-deficit OR apert-syndrome OR apert-crouzon OR noack-syndrome OR acrocephalosyndactyl* OR pfeiffer-syndrome OR chotzen-syndrome OR casperson-syndrome OR cerebral-palsy OR ( ( cdkl5 OR cyclin-dependent-kinase-like-5 OR retts OR rett OR "rett's" ) NEAR/3 ( disorder* OR syndrome ) ) OR west-syndrome OR down*-syndrome OR fetal-alcohol OR fragile-x OR kernicterus OR bilirubin-encephalopath* OR prader-willi OR phenylketonuria OR pku OR pah-deficiency OR phenylalanine-hydroxylase OR muscular-dystrophy OR myodystrophy OR tourette OR tic-disorder OR williams-syndrome OR Infantile-Spasm OR ( developmental NEAR/2 ( hearing-loss OR hearing-impair* ) )) AND noft(child or children OR teen or teenagers OR adolescent OR preteen* OR youth OR toddler OR infant OR baby OR babies OR newborn OR neonate OR preschool* OR pre-school* ) AND noft(caregiver OR guardian OR parent OR mother OR father OR mom OR dad OR family OR families OR grandparent) AND noft(emergicent* OR ( ( emergency OR casualty OR er OR ed ) NEAR/1 ( room OR accident OR ward OR wards OR unit OR units OR department* OR physician OR doctor OR nurs* OR visit* OR care OR setting OR patient OR services OR health-services ) ) OR triage OR ( trauma NEAR/1 ( cent* OR care ) ))

**Supplementary Table 2. Inclusion and exclusion criteria used for study selection**

| **Characteristics** | **Inclusion criteria** | **Exclusion criteria** |
| --- | --- | --- |
| Study design | Primary studies  Quantitative, qualitative, mixed-methods  Observational, cross-sectional, cohort, case study, case series | Abstractsa  Reviews and overviews of reviewsb  Opinion pieces (e.g. commentaries, editorials, letters, etc.)  Intervention studiesc |
| Population | Parents, familial caregivers, or legal guardians of children (0-18 years of age) who have an intellectual and/or developmental disability diagnosisd,e.  Examples include conditions related to developmental, learning, language and speech disorders e.g. global developmental delays | Parents of children who do not have an intellectual and/or developmental disability diagnosis  Parents of children with other health conditions  Children, youth reporting their experiences/information needs  Healthcare professionals  Animal models |
| Outcome | Parents’ self-reported experiencesf and/ or information needsg related to the management of their child with an intellectual or development disability | Proxy reports of parents’ experiences and/ or information needs  Satisfaction with the quality of healthcare received |
| Setting | Emergency Department, Emergency Room | Inpatient care settings such as hospital wards, resident treatment and rehabilitation centers, long-term care facilities (e.g. cancer clinics, dialysis centers). |
| Language | English | Any other language |

a We will contact the corresponding author of the abstract twice and request access to the full text. If they do not respond, we will exclude the abstract.

b We will flag relevant reviews and overviews to scan their reference lists and identify any additional studies relevant to our review that were not captured in our search.

c We will exclude intervention studies (e.g. educational interventions, behavioral modification interventions) that aimed to influence parents’ experiences or information needs in relation to their experiences in the emergency department. However, if the study reports baseline data related to parents’ experiences and/or information needs, we will include that data only.

d IDD diagnosis could be at birth, during childhood or acquired (e.g. after Stroke, Traumatic Brain Injury).

e Studies including caregivers of both pediatric and adult populations will be included if: 1) pediatric data can be isolated; or 2) the mean age plus one standard deviation is <18 years or 3) at least 80% of the overall population was under the age of 18 years.

f Defined as how parents feel (e.g. scared, calm, confident) and act (e.g. supportive, withdrawn, anxious) before, during and after their child attends the emergency department.

g Defined as the type, content or topic, quantity, frequency, and mode of delivery of information that parents require or desire to receive (parents’ or caregivers’ preferences).

**Supplementary Table 3. MMAT Assessments**

| **Quantitative descriptive design (n = 3)** | | | | | |
| --- | --- | --- | --- | --- | --- |
| **Study** | **Domains** | | | | |
| **Is the sampling strategy relevant to address the research question?** | **Is the sample representative of the target population?** | **Are the measurements appropriate?** | **Is the risk of nonresponse bias low?** | **Is the statistical analysis appropriate to answer the research question?** |
| Garrick31 2022 | Y | Y | Y | CT | Y |
| Gupta33 2019 | Y | Y | Y | CT | Y |
| Lunsky30 2018 | Y | N | Y | Y | Y |
| **Qualitative design (n = 3)** | | | | | |
|  | **Is the qualitative approach appropriate to answer the research question?** | **Are the qualitative data collection methods adequate to address the research question?** | **Are the findings adequately derived from the data?** | **Is the interpretation of results sufficiently substantiated by data?** | **Is there coherence between qualitative data sources, collection, analysis and interpretation?** |
| Pillai 202232 | Y | Y | Y | Y | Y |
| Nicholas 2016b34 | Y | N | Y | Y | Y |
| Muskat 201614 | Y | Y | Y | Y | Y |
| **Mixed-method design (n = 1)** | | | | | |
| Litwin 202229 | **Is the qualitative approach appropriate to answer the research question?** | **Are the qualitative data collection methods adequate to address the research question?** | **Are the findings adequately derived from the data?** | **Is the interpretation of results sufficiently substantiated by data?** | **Is there coherence between qualitative data sources, collection, analysis and interpretation?** |
| Y | Y | Y | Y | Y |
| **Is the sampling strategy relevant to address the research question?** | **Is the sample representative of the target population?** | **Are the measurements appropriate?** | **Is the risk of nonresponse bias low?** | **Is the statistical analysis appropriate to answer the research question?** |
| Y | Y | CT | CT | Y |
| **Is there an adequate rationale for using a mixed methods design to address the research question?** | **Are the different components of the study effectively integrated to answer the research question?** | **Are the outputs of the integration of qualitative and quantitative components adequately interpreted?** | **Are divergences and inconsistencies between quantitative and qualitative results adequately addressed?** | **Do the different components of the study adhere to the quality criteria of each tradition of the methods involved?** |
| Y | Y | Y | N | CT |

Notes: Y: Yes; N: No; CT: Can’t tell. Adapted from Hong QN, Fàbregues S, Bartlett G, et al. The Mixed Methods Appraisal Tool (MMAT) version 2018 for information professionals and researchers. *Education for information.* 2018;34(4):285-291.

**Supplementary Table 4. Characteristics of included studies and outcomes reported (N=7)**

| **First author Year**  **Country**  **Study design** | **Study participants** | **Outcome of interest**   - **Experiences** - **Information needs** | **Measurement method**  **Time of data collection** | **Relevant data reported in the studya (synthesized theme)** | **MMAT %** |
| --- | --- | --- | --- | --- | --- |
| Garrick31 2022  Australia  Quantitative descriptive | Parents of a child aged under 18 years with a diagnosis of ASD who attended an ED in Australia with their child at least once within the past 2 years  N = 421 (98% mothers)  Age: NR | Experiences around quality of care at ED (e.g., staff knowledge of ASD, staff communication, wait time, staff interaction and communication with their child) and sensory experiences at ED  Information need: NR | Online Google survey including structured and unstructured questions  Within 2 years of ED visit | **Lengthy wait times**  **Fear of being judged by ED staff**  **Impact of ED environment on their child**  **ED staff knowledge and interaction**  **Working in partnership with ED staff)** | 80 |
| Gupta33 2019  USA  Quantitative descriptive | Parents of patients equal or >3 years of age with a sensory sensitivity in the ED or inpatient units  N = NR  Age: NR | Parents' experiences with sensory kits at ED  Information need: NR | Retrospective chart review, Survey  During ED/in-patient visit | **Experiences around sensory kits in ED**  **Experiences around sensory kits in ED** | 80 |
| Litwin29 2022  Canada  Mixed Methods | Parents of children with ASD who had attended the ED with their child in the past year  N = 14 (93% mothers) Interviews, 18 satisfaction surveys (parental role NR)  Age: NR | Experiences in ED and analogous high sensory settings  Information need: NR | Semi-structured one-on-one interviews, in-person or via phone, journey maps and satisfaction surveys  Within 12 months of ED visit | **Child’s problem ignored/disregarded**  **Disclosing child’s condition**  **Working in partnership with ED staff** | 60 |
| Lunsky 201830  Canada  Quantitative descriptive | Parents of adolescent/adult patients with ASD who provided descriptive information about their child's ED visit during the study period  N = 46  Age: NR | Experiences during child’s ED visit  Information need: NR | Surveys conducted via mail, telephone interview, or online  ED visits during the 12 months that preceded participants’ final survey (each survey was within 2 months of the last ED visit) | **Limited ED role**  **Restraint strategies used at ED** | 80 |
| Muskat 201614 (Associated publications:  Nicholas 2016a7  Nicholas 202015)  Canada  Qualitative | Parents of a child with ASD treated at two tertiary-level pediatric EDs  N = 28 (79% mothers)  Age (mean): 42.0 | Benefits and risk of ASD diagnosis disclosure and experiences around care delivery after disclosure  Information need: NR | Semi-structured interviews  Shortly after their ED visit; however, time between initial ED visit and participant interviews ranged from weeks to a number of months due to instances of limited availability of some participants | **Fear of being judged by ED staff**  **Disclosing child’s condition** | 100 |
| Nicholas 2016a7  (secondary analysis) | Parents of a child with ASD treated at two tertiary-level pediatric EDs  N = 31 (77% mothers)  Age range: 31-51 years (mean: 42.7) | Challenges of ED care for children with ASD (e.g., ED care processes, communication and behavioral issues, lack of staff knowledge about ASD)  Information need: ASD-friendly resource development | Semi-structured interviews with open-ended questions  Participants were introduced to the study either while attending the ED, or within 1 month of the ED visit | **Limited ED role**  **Child’s problem ignored/disregarded**  **Lack of organized/desired information** | N/A |
| Nicholas 202015  (secondary analysis) | Parents of a child with ASD treated at two tertiary-level pediatric EDs  N = 31 (77% mothers)  Age range: 31-51 years (mean: 42.7) | Experiences in the ED (e.g., dignity and respect, participation and collaboration)  Information need: Information sharing | Semi-structured interviews with open-ended questions  Participants were introduced to the study either while attending the ED, or within 1 month of the ED visit | **Child’s problem ignored/disregarded**  **ED staff knowledge and interaction**  **Lack of organized/desired information** | N/A |
| Nicholas 2016b34  Canada  Qualitative | Participants previously interviewed about ASD related ED practices within an earlier phase of the study (Nicholas 2016a) and additional participants who had extensive experience in the topic under study  N = 16  Age: NR | Perceived gaps and needs in ED care for children with ASD  Information need: Follow-up resources | In-person focus group interviews  NR but likely same as in Muskat 2016 | **Lengthy wait times**  **Restrain strategies used at ED** | 80 |
| Pillai 202232  Australia  Qualitative | Parents and carers who accompanied their child to the ED of The Royal Children's Hospital, Melbourne, between September 2020 and August 2021, where the young person had a diagnosis of ASD and/or ID and a presenting complaint of BOC  N = 14 (71% mothers/grandmothers)  Age: NR | Impact of the ED environment on the child  Information need: NR | Semi structured interviews conducted by the study author, following a guide which was pilot tested and refined after two interviews  Within 6 weeks of their ED visit | **Limited ED role**  **Worrying about using a special resource like ED**  **Lengthy wait times** | 100 |

ASD: Autism spectrum disorder; BOC: Behaviours of concern; ID: Intellectual disability; NR: Not reported; ED: Emergency department

a Quantitative data are presented as reported in the study; example quotes from qualitative studies are presented with quotation marks.

b Nicholas 2020 was based on the secondary analysis of the qualitative data collected in Nicholas 2016a (same study design and study population).

7. Nicholas DB, Zwaigenbaum L, Muskat B, et al. Experiences of emergency department care from the perspective of families in which a child has autism spectrum disorder. *Soc Work Health Care.* 2016a;55(6):409-426.

14. Muskat B, Greenblatt A, Nicholas DB, et al. Parent and health care provider perspectives related to disclosure of autism spectrum disorder in pediatric emergency departments. *Autism.* 2016;20(8):986-994.

15. Nicholas DB, Muskat B, Zwaigenbaum L, et al. Patient- and Family-Centered Care in the Emergency Department for Children With Autism. Pediatrics. 2020;145(Suppl 1):S93-s98.

29. Litwin S, Sellen K. Designing a Sensory Kit to Improve the Environment for Children with Autism Spectrum Disorder in the Pediatric Emergency Department. *Journal of autism and developmental disorders.* 2022(7904301, hgw).

30. Lunsky Y, Tint A, Weiss JA, Palucka A, Bradley E. A review of emergency department visits made by youth and adults with autism spectrum disorder from the parent perspective. *Advances in Autism.* 2018;4(1):10-18.

31. Garrick A, Lee ML, Scarffe C, et al. An Australian Cross-Sectional Survey of Parents' Experiences of Emergency Department Visits Among Children with Autism Spectrum Disorder. *Journal of autism and developmental disorders.* 2022;52(5):2046-2060.

32.Pillai J, Dunn K, Efron D. Parent-reported factors associated with the emergency department presentation of children and adolescents with autism spectrum disorder and/or intellectual disability with behaviours of concern: a qualitative study. Archives of disease in childhood. 2022(6xg, 0372434).

33. Gupta N, Brown C, Deneke J, Maha J, Kong M. Utilization of a Novel Pathway in a Tertiary Pediatric Hospital to Meet the Sensory Needs of Acutely Ill Pediatric Patients. *Frontiers in pediatrics.* 2019;7(101615492):367.

34. Nicholas DB, Zwaigenbaum L, Muskat B, et al. Toward Practice Advancement in Emergency Care for Children With Autism Spectrum Disorder. Pediatrics. 2016b;137 Suppl 2(oxv, 0376422):S205-211.
